# Supplementary material
Source: MDPI journal article supplement (https://www.mdpi.com/2306-5338/11/5/62)
Supplement: s1 [file s1]

**Hydropedological characterization of a coal mining waste deposition area affected by self-burning**

Jorge Espinha Marques, Aracelis Narayan, Patrícia Santos, Joana Ribeiro, Sara C. Antunes, Armindo Melo, Fernando Rocha, Deolinda Flores, and Catarina Mansilha

**Supplementary Materials**

**Table S1.** Soil morphological characteristics of the Uphill Soil (US) hydropedological zone.

| Soil feature                                            | O horizon                              | Ah horizon                                          | C horizon                                                          |
|---------------------------------------------------------|----------------------------------------|-----------------------------------------------------|--------------------------------------------------------------------|
| Colour                                                  | –                                      | 10YR4/4<br>(dark yellowish brown)                   | –                                                                  |
| Texture                                                 | –                                      | silt loam                                           | –                                                                  |
| Structure<br>(morphology/distinctiveness/<br>size)      | –                                      | subangular blocky/strong/fine                       | –                                                                  |
| Thickness                                               | 10–15 cm                               | 15–25 cm                                            | 20–50 cm                                                           |
| Lower boundary<br>(distinctness/topography)             | clear/smooth                           | gradual/wavy                                        | –                                                                  |
| Organic matter<br>(presence/abundance/<br>humification) | present/abundant/<br>none to incipient | present/abundant/<br>humified                       | mostly absent/none to very<br>scarce/humified                      |
| Porosity (size/abundance)                               | –                                      | very fine/common,<br>fine/few,<br>medium/ very few  | –                                                                  |
| Biological activity (roots:<br>diameter/abundance)      | –                                      | very fine/common,<br>fine/common<br>medium/very few | very fine/none,<br>fine/none<br>medium/very few<br>coarse/very few |

**Table S2.** Soil morphological characteristics of the Unburned Coal Waste Pile (UCW) hydropedological zone.

| Soil feature                                            | O horizon                              | Incipient A horizon                                                   | C horizon                                                          |
|---------------------------------------------------------|----------------------------------------|-----------------------------------------------------------------------|--------------------------------------------------------------------|
| Colour                                                  | –                                      | 5Y3/1 (very dark gray)                                                | –                                                                  |
| Texture                                                 | –                                      | silt loam/sandy loam                                                  | –                                                                  |
| Structure<br>(morphology/distinctiveness/<br>size)      | –                                      | apedal                                                                | –                                                                  |
| Thickness                                               | 1–5 cm                                 | 2–8 cm                                                                | > 100 cm                                                           |
| Lower boundary<br>(distinctness/topography)             | gradual/wavy                           | gradual/wavy                                                          | –                                                                  |
| Organic matter<br>(presence/abundance/<br>humification) | present/abundant/<br>none to incipient | present/scarce/<br>humified                                           | mostly absent/none to very<br>scarce/humified                      |
| Porosity (size/abundance)                               | –                                      | very fine/common,<br>fine/common,<br>medium/few<br>coarse/few         | very fine/common,<br>fine/common,<br>medium/few<br>coarse/few      |
| Biological activity (roots:<br>diameter/abundance)      | –                                      | very fine/few,<br>fine/very few<br>medium/very few<br>coarse/very few | very fine/none,<br>fine/none<br>medium/very few<br>coarse/very few |

**Table S3.** Soil morphological characteristics of the Mixed Burned Coal Waste (MBW) hydropedological zone.

| Soil feature                                            | C horizon                                                     |
|---------------------------------------------------------|---------------------------------------------------------------|
| Colour                                                  | 5Y2.5/1 (black)                                               |
| Texture                                                 | silt loam/loamy sand                                          |
| Structure<br>(morphology/distinctiveness/<br>size)      | apedal                                                        |
| Thickness                                               | > 100 cm                                                      |
| Lower boundary<br>(distinctness/topography)             | –                                                             |
| Organic matter<br>(presence/abundance/<br>humification) | absent                                                        |
| Porosity (size/abundance)                               | very fine/common,<br>fine/common,<br>medium/few<br>coarse/few |
| Biological activity (roots:<br>diameter/abundance)      | medium/very few<br>coarse/very few                            |

**Table S4.** Soil morphological characteristics of the Burned Coal Waste Pile (BCW) hydropedological zone.

| Soil feature                                        | C1 horizon<br>(cover layer, CL)                              | C2 horizon<br>(burned material, BW)             |
|-----------------------------------------------------|--------------------------------------------------------------|-------------------------------------------------|
| Colour                                              | 7.5YR7/6<br>(reddish yellow)                                 | 5Y3/1<br>(very dark gray)                       |
| Texture                                             | silt loam/sandy loam/loam                                    | silt loam                                       |
| Structure<br>(morphology/distinctiveness/size)      | apedal                                                       | apedal                                          |
| Thickness                                           | 30–40 cm                                                     | > 100 cm                                        |
| Lower boundary<br>(distinctness/topography)         | clear/wavy                                                   | –                                               |
| Organic matter<br>(presence/abundance/humification) | present/scarce/humified                                      | absent                                          |
| Porosity (size/abundance)                           | very fine/few,<br>fine/common<br>medium/common<br>coarse/few | very fine/common,<br>fine/common,<br>medium/few |
| Biological activity (roots:<br>diameter/abundance)  | –                                                            | –                                               |

**Table S5.** Soil morphological characteristics of the Downhill Soil (DS) hydropedological zone.

| Soil feature                                        | O horizon                              | Ap horizon                                              | C horizon                                                          |
|-----------------------------------------------------|----------------------------------------|---------------------------------------------------------|--------------------------------------------------------------------|
| Colour                                              | –                                      | 10YR3/2 (very dark greyish brown)                       | –                                                                  |
| Texture                                             | –                                      | silt loam                                               | –                                                                  |
| Structure<br>(morphology/distinctiveness/size)      | –                                      | subangular<br>blocky/moderate to weak/very fine to fine | –                                                                  |
| Thickness                                           | 5–8 cm                                 | 35–45 cm                                                | 50–100 cm                                                          |
| Lower boundary<br>(distinctness/topography)         | clear/smooth                           | gradual/wavy                                            | –                                                                  |
| Organic matter<br>(presence/abundance/humification) | present/abundant/<br>none to incipient | present/moderately abundant/humified                    | mostly absent/none to very scarce/humified                         |
| Porosity (size/abundance)                           | –                                      | very fine/few,<br>fine/common,<br>medium/common         | –                                                                  |
| Biological activity (roots:<br>diameter/abundance)  | –                                      | very fine/very few,<br>fine/few<br>medium/few           | very fine/none,<br>fine/none<br>medium/very few<br>coarse/very few |
